# Supplementary material for: The Effectiveness of Proprioceptive Training for Improving Motor Performance and Motor Dysfunction: A Systematic Review
Source: PubMed Central journal article supplement (PMC9397687; doi:10.3389/fresc.2022.830166), 2022-04-08
Supplement: Data_Sheet_1.pdf [file Data_Sheet_1.pdf]

## *Supplementary Material*

### **Appendix A: Search strategies**

Searches in the databases were conducted on October 20, 2020 using the following strategies:

#### **Medline (Ovid):**

- 1) propriocept\*.mp.
- 2) exp Proprioception/
- 3) exp Rehabilitation/ or rehabilitation.mp.
- 4) exp Physical Therapy Modalities/
- 5) proprioceptive training.mp.
- 6) training.mp.
- 7) 1 or 2
- 8) perceptual motor learning.mp.
- 9) motor processes.mp.
- 10) exp Kinesthesia/ or kinesthetic perception.mp.
- 11) Discrimination Learning/
- 12) (“form and shape perception”).mp.
- 13) exp Learning/ or learning.mp.
- 14) motor learning.mp.
- 15) exp Central Nervous System Diseases/ or CNS disorders.mp.
- 16) exp Musculoskeletal Diseases/ or musculoskeletal disorders.mp.
- 17) muscular disorders.mp.
- 18) 15 or 16 or 17
- 19) 9 or 18
- 20) 1 or 2 or 10 or 12
- 21) 5 or 8 or 11 or 14

22) 6 or 13 or 21

23) 19 and 20 and 21

24) limit 23 to (humans and yr="2013 -Current" and (chinese or english or german))

25) 20 and 21 26) limit 25 to (humans and yr="2013 -Current" and (chinese or english or german))

27) 1 or 2 or 5

28) 3 or 4

29) 15 or 16 or 17

30) 27 and 28 and 29

31) limit 30 to (humans and yr="2013 -Current" and (chinese or english or german))

32) exp Postural Balance/

33) 1 or 2 or 10 or 12 or 32

34) 21 and 33

35) neuromuscular training.mp.

36) 21 or 35

37) 33 and 36

#### **CINAHL:**

(MH proprioception+ OR propriocept\*) AND (therapy or treatment or rehabilitation or intervention) AND (learning or training or exercise) NOT Meta-analysis or systematic review in Title or Abstract, limited 2013-current, limited research article & peer reviewed, limit to languages (Chinese, English, German)

#### **SCOPUS:**

TITLE-ABS-KEY ( propriocept\* ) AND TITLE-ABS- KEY ( human AND (controlled AND study) AND training) AND (LIMIT-TO (PUBYEAR, 2020) OR LIMIT-TO (PUBYEAR, 2019) OR LIMIT-TO (PUBYEAR, 2018) OR LIMIT-TO (PUBYEAR, 2017) OR LIMIT-TO (PUBYEAR, 2016) OR LIMIT-TO (PUBYEAR, 2015) OR LIMIT-TO (PUBYEAR, 2014) OR LIMIT-TO (PUBYEAR, 2013)) AND (LIMIT-TO (LANGUAGE, "English") OR LIMIT-TO (LANGUAGE, "German") OR LIMIT-TO (LANGUAGE, "Chinese"))

#### **PsycInfo (Ovid)**

1. Proprioception.mp. or exp Proprioception OR (Form and shape perception\*).mp. OR (Kinesthetic Perception.mp. or exp Kinesthetic Perception) OR (discrimination/ or cognitive discrimination/ or perceptual discrimination/ or stimulus discrimination/ or discrimination learning/ or perception)

2. (Perceptual motor learning).mp. or exp (Perceptual Motor Learning) OR learning.mp. OR (Proprioceptive training).mp.

3. (Muscular disorders.mp. or exp Muscular Disorders) OR (Motor Processes).mp. or (exp Motor Processes) OR (exp Central Nervous System Disorders)/ or (CNS diseases).mp. OR (Musculoskeletal disorders.mp. or exp Musculoskeletal Disorders)

4. 1 AND 2 AND 3

5. limit 4 to (human and (chinese or english or german) and yr="2013 -Current")

**Appendix B:** Effect sizes for between-group comparisons showing Cohen's *d* and Hedge's *g*. For studies that applied multiple proprioceptive or motor measures, respectively, only the proprioceptive and motor measure with the largest improvement between pre- and post-intervention measures is shown.

| Study                           | Disease Entity         | Outcome Measure                                 | Sample Size |          | SD <sub>pooled</sub> | Cohen's <i>d</i> | 95 % CI |        | Hedge's <i>g</i> | 95 % CI |        |
|---------------------------------|------------------------|-------------------------------------------------|-------------|----------|----------------------|------------------|---------|--------|------------------|---------|--------|
|                                 |                        |                                                 | Control     | Training |                      |                  | LL      | UL     |                  | LL      | UL     |
| <b>Active movement/balance</b>  |                        |                                                 |             |          |                      |                  |         |        |                  |         |        |
| Alikhani et al., 2019           | Healthy adults         | Active JPSE                                     | 10          | 12       | 1.497                | 1.576            | 0.717   | 2.795  | 1.516            | 0.556   | 2.476  |
|                                 |                        | Lower Quadrant Y-Balance test                   |             |          | 7.596                | †1.438           | †0.586  | †2.618 | †1.383           | †0.443  | †2.324 |
| Büyükturan et al., 2019         | ACL injury (partial)   | Active JPSE                                     | 29          | 29       | 1.265                | 1.344            | 0.811   | 1.982  | 1.326            | 0.756   | 1.896  |
|                                 |                        | International Knee Documentation Committee-2000 |             |          | 16.415               | †0.256           | †-0.262 | †0.794 | †0.252           | †-0.264 | †0.769 |
| Chittrakul et al., 2020         | Healthy elderly adults | JPSE                                            | 36          | 36       | 1.300                | 2.039            | 1.517   | 2.684  | 2.017            | 1.447   | 2.586  |
|                                 |                        | CoP displacement                                |             |          | 364.964              | 1.552            | 1.061   | 2.139  | 1.536            | 1.001   | 2.062  |
| Daman et al., 2019              | Hypermobility syndrome | Active JPSE                                     | 12          | 12       | 2.508                | 1.176            | 0.373   | 2.225  | 1.136            | 0.269   | 2.002  |
|                                 |                        | SF-36 - Physical functioning                    |             |          | 9.47                 | †1.197           | †0.393  | †2.251 | †1.156           | †0.287  | †2.025 |
| Daneshvar et al., 2019          | Parkinson's Disease    | JPSE                                            | 10          | 10       | 2.874                | 0.967            | 0.092   | 2.094  | 0.926            | 0.000   | 1.853  |
|                                 |                        | Range of motion knee                            |             |          | 12.855               | †1.262           | †0.382  | †2.467 | †1.208           | †0.249  | †2.249 |
| Eymir, Erduran, and Ünver, 2020 | Total knee replacement | Active JPSE (day of discharge)                  | 55          | 58       | 2.709                | 0.997            | 0.620   | 1.412  | 0.990            | 0.599   | 1.381  |
|                                 |                        | TUG (day of discharge)                          |             |          | 26.74                | 0.430            | 0.061   | 0.816  | 0.427            | 0.054   | 0.800  |
| El Shemy, 2018                  | Cerebral Palsy         | Active JPSE                                     | 15          | 15       | 3.057                | 1.963            | 1.191   | 3.043  | 1.910            | 1.039   | 2.781  |
|                                 |                        | modified TUG                                    |             |          | 2.876                | 1.878            | 1.114   | 2.938  | 1.827            | 0.968   | 2.686  |
| El-Gohary et al., 2016          | Healthy adults         | Active JPSE                                     | 30          | 30       | 1.487                | 0.874            | 0.366   | 1.45   | 0.863            | 0.333   | 1.393  |
|                                 |                        | Stability Index (AP direction)                  |             |          | 1.523                | 1.773            | 1.224   | 2.453  | 1.750            | 1.152   | 2.347  |
| El-Gohary et al., 2017          | Cerebral Palsy         | Passive JPSE                                    | 24          | 24       | 1.371                | 0.766            | 0.200   | 1.406  | 0.753            | 0.167   | 1.340  |
|                                 |                        | Gross motor function (walking)                  |             |          | 4.393                | †0.824           | †0.257  | †1.471 | †0.811           | †0.221  | 1.400  |
|                                 |                        | Active JPSE                                     | 12          | 12       | 1.051                | 3.331            | 2.980   | 5.022  | 3.215            | 1.979   | 4.451  |

Supplementary Material

|                                              |                              |                                                                  |     |     |         |                          |         |        |        |        |        |
|----------------------------------------------|------------------------------|------------------------------------------------------------------|-----|-----|---------|--------------------------|---------|--------|--------|--------|--------|
| <b>Hu et al., 2016</b>                       | Healthy adults               | Writing time                                                     |     |     | 6.912   | 1.071                    | 0.270   | 2.095  | 1.034  | 0.178  | 1.889  |
| <b>Kumar, Kumar, and Kumar, 2013</b>         | Knee osteoarthritis          | Active JPSE                                                      | 22  | 22  | 1.961   | 1.117                    | 0.518   | 1.833  | 1.100  | 0.461  | 1.732  |
|                                              |                              | Western Ontario and McMaster Universities Osteoarthritis Index   |     |     | 2.971   | 1.027                    | 0.431   | 1.731  | 1.008  | 0.379  | 1.637  |
| <b>E. Lee, Cho, and Lee, 2019</b>            | Chronic ankle instability    | Active JPSE                                                      | 15  | 15  | N/A     | *eta <sup>2</sup> =0.14  | N/A     | N/A    | N/A    | N/A    | N/A    |
|                                              |                              | Stability Index                                                  |     |     | N/A     | *eta <sup>2</sup> =0.192 | N/A     | N/A    | N/A    | N/A    | N/A    |
| <b>Merom et al., 2016</b>                    | Healthy elderly adults       | Active JPSE                                                      | 147 | 275 | N/A     | not sig.                 | N/A     | N/A    | N/A    | N/A    | N/A    |
|                                              |                              | Center of pressure displacement                                  |     |     | 165.154 | †-0.279                  | †-0.482 | †0.078 | †0.278 | †0.077 | †0.479 |
| <b>Salles et al., 2018</b>                   | Infraspinatus muscle atrophy | Active JPSE                                                      | 18  | 18  | 0.544   | 2.595                    | 1.822   | 3.697  | 2.537  | 1.651  | 3.424  |
|                                              |                              | Shoulder external rotation peak torque                           |     |     | 6.017   | †1.612                   | †0.929  | †2.505 | †1.576 | †0.824 | †2.328 |
| <b>Shiravi et al., 2019</b>                  | Neck pain                    | Active JPSE                                                      | 44  | 43  | 0.523   | 5.736                    | 4.894   | 6.85   | 5.686  | 4.735  | 6.636  |
|                                              |                              | Isometric scapular upward rotation muscle strength               |     |     | N/A     | not sig.                 | N/A     | N/A    | N/A    | N/A    | N/A    |
| <b>Sohn and Kim, 2015</b>                    | Healthy adults               | Passive JPSE                                                     | 6   | 6   | N/A     | not sig.                 | N/A     | N/A    | N/A    | N/A    | N/A    |
|                                              |                              | Isokinetic knee extension muscle strength†                       |     |     | 7.663   | †2.505                   | †1.272  | †4.945 | †2.313 | †0.801 | †3.824 |
| <b>Zarei and Norasteh, 2020</b>              | Deaf                         | Active JPSE                                                      | 10  | 10  | N/A     | N/A                      | N/A     | N/A    | N/A    | N/A    | N/A    |
|                                              |                              | Single leg stance (eyes closed)                                  |     |     | 2.155   | †1.949                   | †1.024  | †3.367 | †1.866 | †0.802 | †2.931 |
| <b>Somatosensory stimulation Training</b>    |                              |                                                                  |     |     |         |                          |         |        |        |        |        |
| <b>Cho et al., 2015</b>                      | Knee osteoarthritis          | Active JPSE                                                      | 23  | 23  | 4.008   | 2.670                    | 1.969   | 3.629  | 2.624  | 1.829  | 3.419  |
|                                              |                              | Pain-free active range of motion                                 |     |     | 10.847  | †1.872                   | †1.244  | †2.684 | †1.840 | †1.146 | †2.533 |
| <b>Fu et al., 2013</b>                       | ACL reconstruction           | Passive JPSE                                                     | 20  | 19  | N/A     | not sig.                 | N/A     | N/A    | N/A    | N/A    | N/A    |
|                                              |                              | Stability Index (AP direction)                                   |     |     | 1.843   | 0.873                    | 0.245   | 1.608  | 0.856  | 0.198  | 1.513  |
| <b>Naderi, Rezvani, and Degens, 2020</b>     | Healthy adults               | JPSE*                                                            | 40  | 40  | N/A     | 0.93                     | N/A     | N/A    | N/A    | N/A    | N/A    |
|                                              |                              | Isokinetic knee extension muscle strength*                       |     |     | N/A     | 0.66                     | N/A     | N/A    | N/A    | N/A    | N/A    |
| <b>Somatosensory Discrimination Training</b> |                              |                                                                  |     |     |         |                          |         |        |        |        |        |
| <b>McLean et al., 2017</b>                   | Hemiplegic Cerebral Palsy    | Active JPSE                                                      | 10  | 8   | N/A     | N/A                      | N/A     | N/A    | N/A    | N/A    | N/A    |
|                                              |                              | Goal Attainment Scaling*                                         |     |     | N/A     | 0.79                     | N/A     | N/A    | N/A    | N/A    | N/A    |
| <b>Combined/Multiple System Training</b>     |                              |                                                                  |     |     |         |                          |         |        |        |        |        |
| <b>Akinoğlu et al., 2017</b>                 | Plantar Fasciitis            | Passive JPSE                                                     | 18  | 18  | 1.916   | 0.819                    | 0.166   | 1.581  | 0.801  | 0.121  | 1.481  |
|                                              |                              | American Orthopedic Foot and Ankle Society Ankle-Hind foot Score |     |     | 11.637  | †1.308                   | †0.642  | †2.145 | †1.279 | †0.559 | †1.999 |
|                                              |                              | Passive JPSE                                                     | 20  | 20  | 0.985   | 2.234                    | 1.533   | 3.189  | 2.189  | 1.400  | 2.979  |

|                                                                                                                                                                                                                                                                                       |                        |                                           |    |    |       |        |        |        |        |         |        |
|---------------------------------------------------------------------------------------------------------------------------------------------------------------------------------------------------------------------------------------------------------------------------------------|------------------------|-------------------------------------------|----|----|-------|--------|--------|--------|--------|---------|--------|
| <b>Alahmari et al., 2020</b>                                                                                                                                                                                                                                                          | Ankle Sprain           | Knee-to-wall distance (cm)                |    |    | 1.020 | †2.942 | †2.164 | †4.049 | †2.883 | †1.989  | †3.778 |
| <b>Lim, 2019</b>                                                                                                                                                                                                                                                                      | Stroke                 | Active JPSE                               | 15 | 15 | 2.743 | †0.558 | †0.016 | †1.367 | †0.543 | †-0.187 | †1.272 |
|                                                                                                                                                                                                                                                                                       |                        | Stability Index                           |    |    | 0.78  | †0.577 | †0.141 | †1.389 | †0.561 | †-0.169 | †1.292 |
| <b>Wei et al., 2013</b>                                                                                                                                                                                                                                                               | ACL relaxation         | Passive JPSE                              | 15 | 16 | N/A   | N/A    | N/A    | N/A    | N/A    | N/A     | N/A    |
|                                                                                                                                                                                                                                                                                       |                        | Lysholm Knee Score                        |    |    | 7.36  | †0.666 | †0.039 | †1.475 | †0.648 | †-0.075 | †1.372 |
| <b>Meditation</b>                                                                                                                                                                                                                                                                     |                        |                                           |    |    |       |        |        |        |        |         |        |
| <b>Chatutain et al., 2019</b>                                                                                                                                                                                                                                                         | Healthy elderly adults | Active JPSE                               | 29 | 29 | 1.681 | 1.071  | 0.549  | 1.677  | 1.057  | 0.506   | 1.607  |
|                                                                                                                                                                                                                                                                                       |                        | Functional Reach Test                     |    |    | 5.064 | †2.113 | †1.531 | †2.857 | †2.085 | †1.442  | †2.727 |
| <b>Cherup et al., 2020</b>                                                                                                                                                                                                                                                            | Parkinson's Disease    | Joint position sense detection threshold* | 18 | 15 | N/A   | †0.72  | †0.1   | †1.4   | N/A    | N/A     | N/A    |
|                                                                                                                                                                                                                                                                                       |                        | Tinetti Score*                            |    |    | 3.141 | 0.77   | 0.1    | 1.5    | N/A    | N/A     | N/A    |
| <b>Legend:</b> †Direction of effect size was converted that increment indicates improvement. *effect size reported in study (Cohen's d unless otherwise specified). AP – anterior-posterior; JPSE – Joint position sense error; N/A – data not available; TUG – Timed Up and Go Test. |                        |                                           |    |    |       |        |        |        |        |         |        |
